# Supplementary material for: The cyclin D1 carboxyl regulatory domain controls the division and differentiation of hematopoietic cells
Source: PubMed Central journal article supplement (PMC4851827; doi:10.1186/s13062-016-0122-9), 2016-04-29

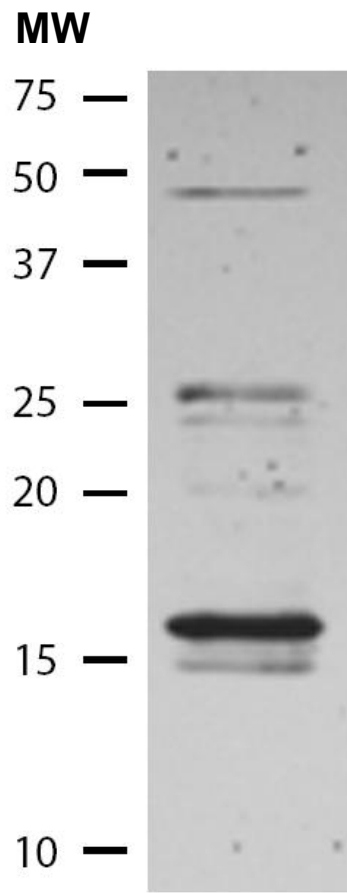

Chaves-Ferreira *et al*, **Additional Figure 1**

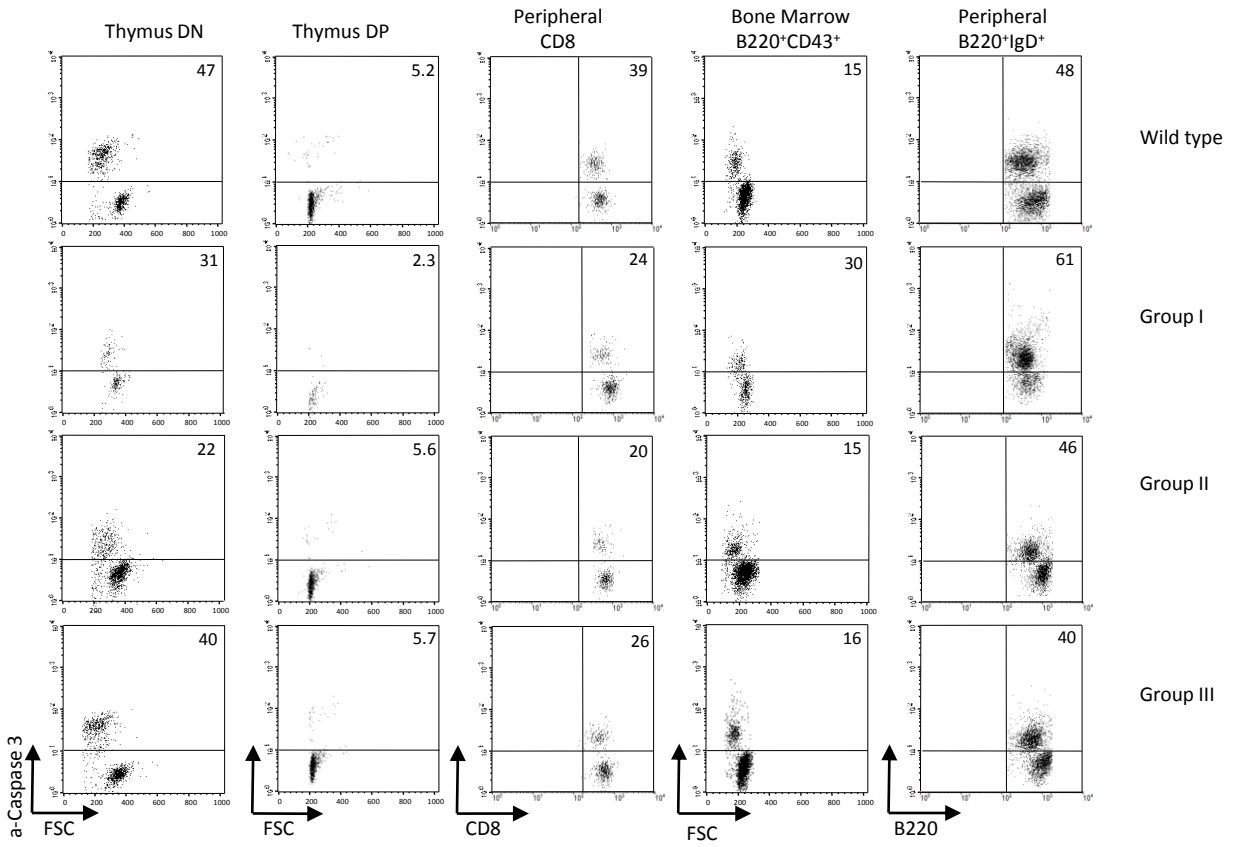

Chaves-Ferreira *et al*, Additional Figure 2

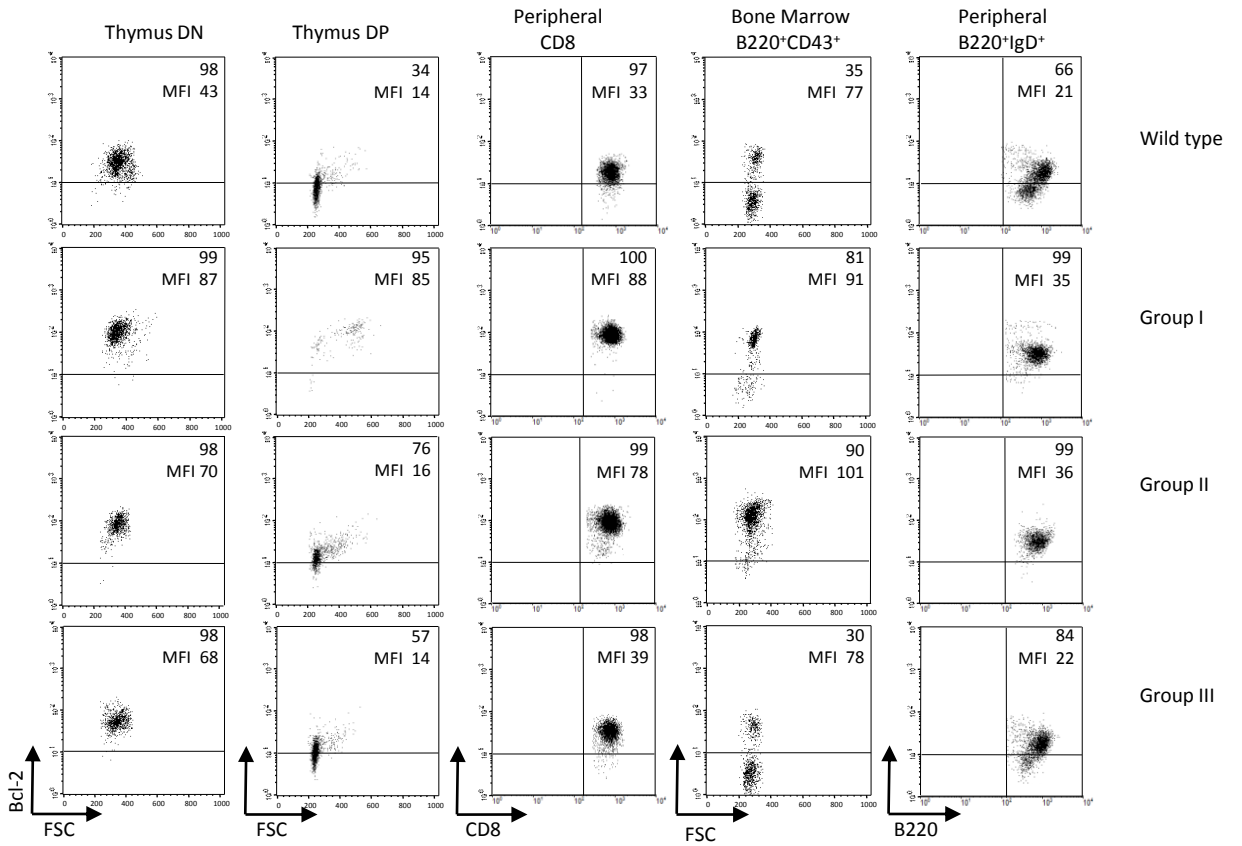

Chaves-Ferreira *et al*, Additional Figure 3

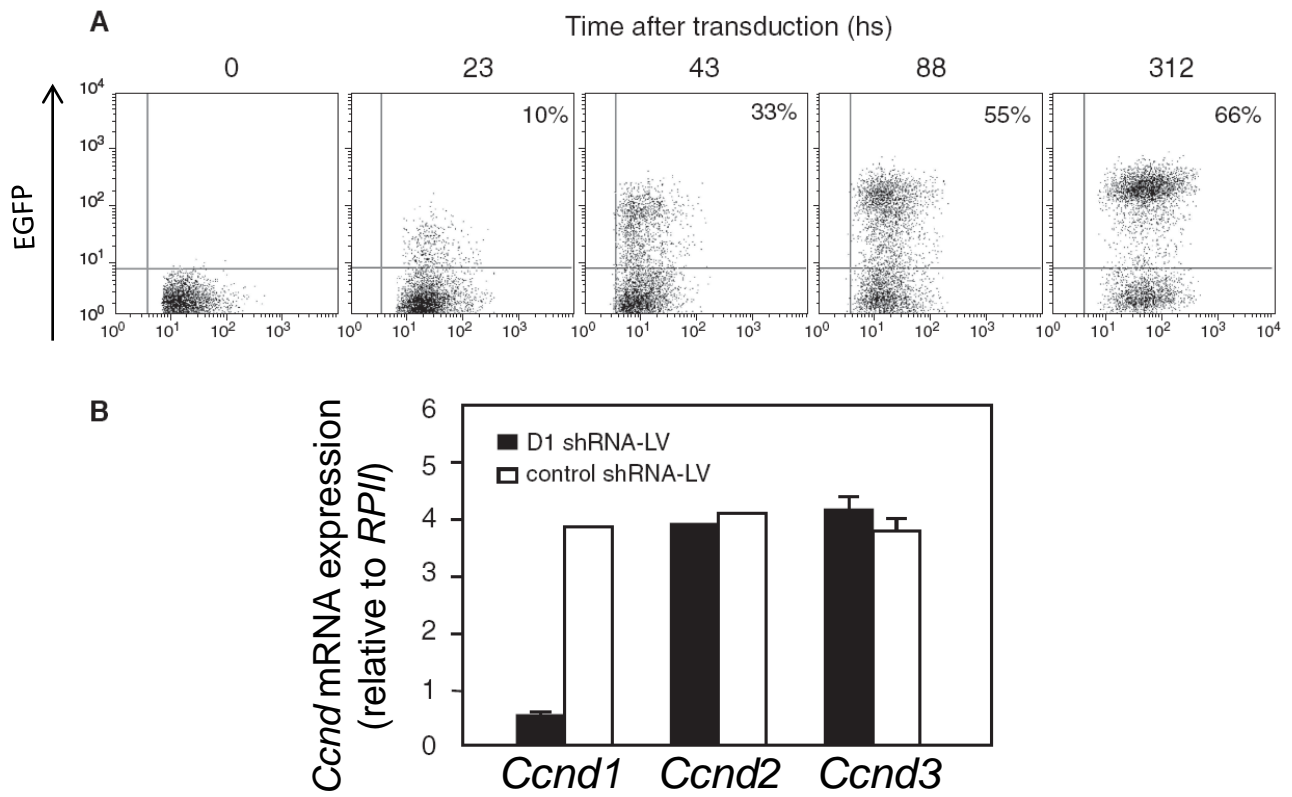

Chaves-Ferreira *et al*, Additional Figure 4

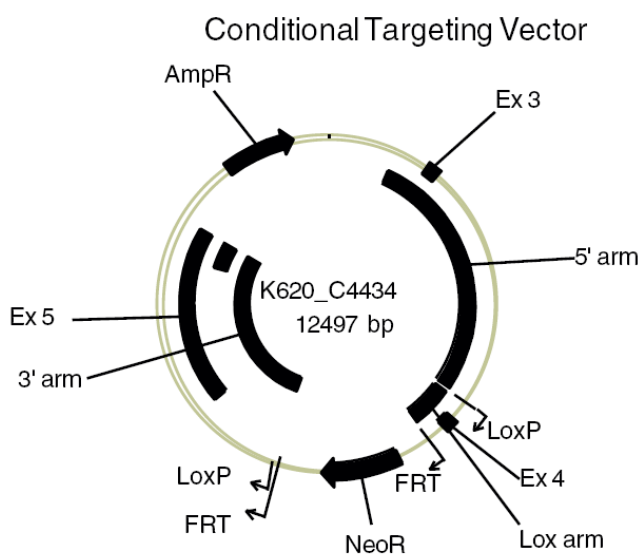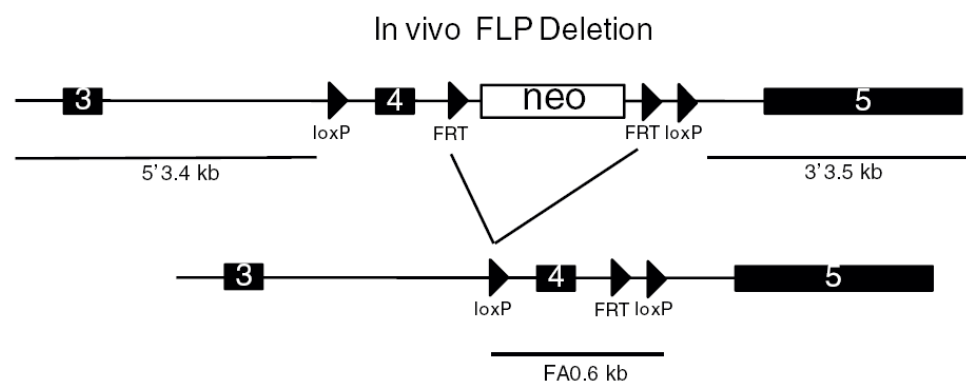

Legend:  
 5': 5' homology arm;      FA: floxed fragment;      3': 3' homology arm  
 This schematic representation is not on scale

**Chaves-Ferreira *et al*, Additional Figure 5**

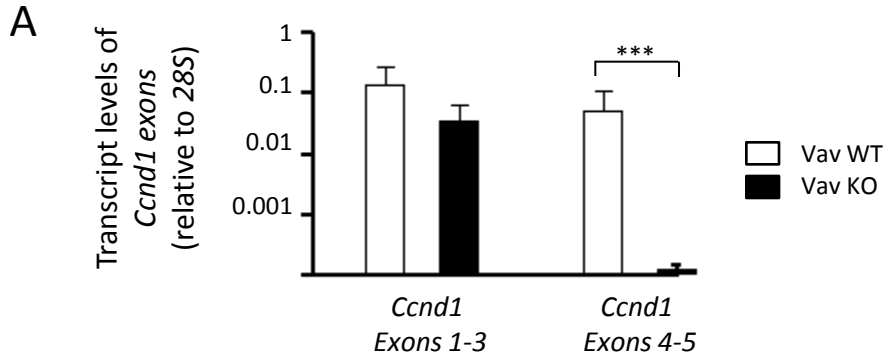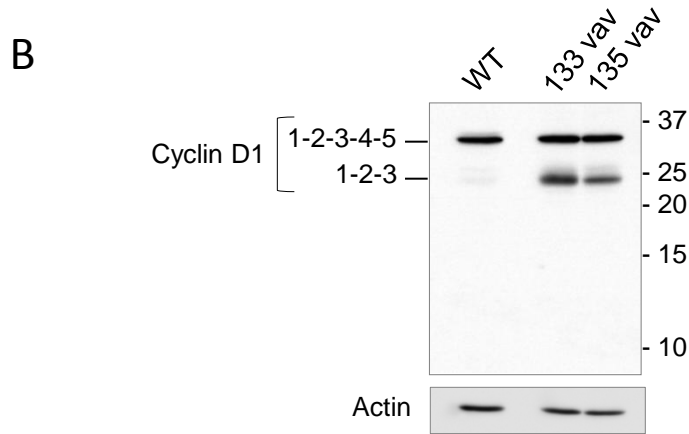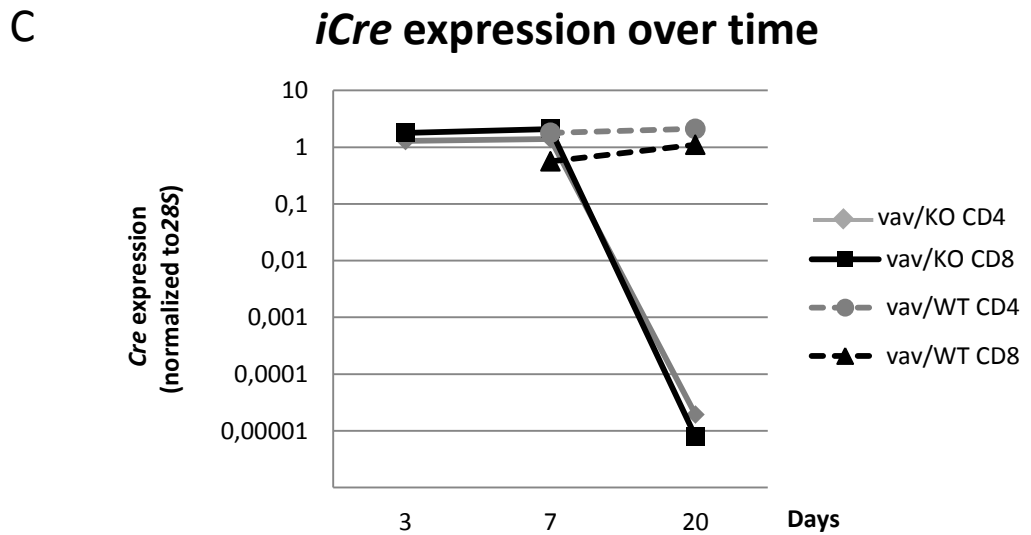

Supplement: 13062_2016_122_MOESM1_ESM.pdf [file 13062_2016_122_MOESM1_ESM.pdf]
